# Supplementary material for: Calculated Cancer Risks for Conventional and “Potentially Reduced Exposure Product” Cigarettes
Source: Oxford University Press journal article supplement (doi:10.1158/1055-9965.epi-06-0762), 2007-03-01
Supplement: 10559965epi060762-sup-cebp_3-1-2007_pankow_table_2.pdf [file 10559965epi060762-sup-cebp_3-1-2007_pankow_table_2.pdf]

**Table S2.a.** Incremental lifetime cancer risk values ( $ILCR_1^i$ ) based on CSF Set I for 13 carcinogens from seven brands of cigarettes categorized here as “regular” (“R”) according to the criterion “tar”  $\geq$  15 mg, as based on FTC tar yield (not brand name).

| Cigarette Brand:                                                   | Marlboro  |          | Camel     | Kool King | Basic      | Marlboro  | Newport       |
|--------------------------------------------------------------------|-----------|----------|-----------|-----------|------------|-----------|---------------|
|                                                                    | King F HP | F HP Men | “R” NF SP | F SP Men  | King NF SP | King F SP | King F SP Men |
| Acetaldehyde                                                       | 5.E-05    | 7.E-05   | 5.E-05    | 5.E-05    | 5.E-05     | 5.E-05    | 6.E-05        |
| Acrylonitrile                                                      | 2.E-05    | 2.E-05   | 4.E-05    | 3.E-05    | 4.E-05     | 2.E-05    | 3.E-05        |
| 4-Aminobiphenyl                                                    | 5.E-07    | 5.E-07   | 6.E-07    | 4.E-07    | 7.E-07     | 5.E-07    | 4.E-07        |
| Arsenic                                                            | 8.E-07    | 9.E-07   | 9.E-07    | 7.E-07    | 2.E-06     | 8.E-07    | 1.E-06        |
| Benzene                                                            | 8.E-06    | 9.E-06   | 8.E-06    | 1.E-05    | 1.E-05     | 9.E-06    | 9.E-06        |
| Benzo[a]pyrene                                                     | 4.E-07    | 5.E-07   | 6.E-07    | 5.E-07    | 7.E-07     | 5.E-07    | 5.E-07        |
| 1,3-Butadiene                                                      | 4.E-05    | 4.E-05   | 4.E-05    | 5.E-05    | 5.E-05     | 3.E-05    | 4.E-05        |
| Cadmium                                                            | 4.E-06    | 5.E-06   | 5.E-06    | 4.E-06    | 6.E-06     | 4.E-06    | 4.E-06        |
| Formaldehyde                                                       | 1.E-05    | 2.E-05   | 2.E-05    | 1.E-05    | 2.E-05     | 1.E-05    | 2.E-05        |
| Lead                                                               | 1.E-08    | 1.E-08   | 1.E-08    | 1.E-08    | 2.E-08     | 1.E-08    | 1.E-08        |
| NNK <sup>a</sup> (uses CSF_oral <sup>b</sup> )                     | 4.E-05    | 4.E-05   | 4.E-05    | 3.E-05    | 4.E-05     | 4.E-05    | 4.E-05        |
| NNN <sup>a</sup>                                                   | 2.E-06    | 1.E-06   | 2.E-06    | 1.E-06    | 2.E-06     | 2.E-06    | 1.E-06        |
| Quinoline (uses CSF_oral <sup>b</sup> )                            | 1.E-05    | 2.E-05   | 3.E-05    | 2.E-05    | 3.E-05     | 1.E-05    | 1.E-05        |
| <i>Cancer Risk Sub-Totals</i>                                      |           |          |           |           |            |           |               |
| Human lung carcinogens <sup>c,d</sup><br>$ILCR_1^{sub\Sigma-lung}$ | 4.E-05    | 5.E-05   | 6.E-05    | 5.E-05    | 6.E-05     | 4.E-05    | 5.E-05        |
| All cancers: $ILCR_1^{sub\Sigma}$                                  | 2.E-04    | 2.E-04   | 2.E-04    | 2.E-04    | 3.E-04     | 2.E-04    | 2.E-04        |

Abbreviations: F = filtered; NF = nonfiltered; HP = hard pack; Men = menthol; SP = soft pack; and “R” = “regular”.

<sup>a</sup> NNK = 4-(N-nitrosomethylamino)-1-(3-pyridyl)-1-butanone; NNN = N-nitrososonornicotine.

<sup>b</sup> CSF\_oral indicates that the cancer slope factor was determined from an oral exposure study.

<sup>c</sup> According to Integrated Risk Information System, U.S. Environmental Protection Agency.

<sup>d</sup>  $ILCR_1^{sub\Sigma-lung} = \text{sum of } ILCR_1^i \text{ for human lung carcinogens considered here: acrylonitrile, arsenic, cadmium, and formaldehyde.}$

**Table S2.b.** Incremental lifetime cancer risk values ( $ILCR_1^i$ ) based on CSF Set I for 13 carcinogens from nine brands of cigarettes and one reference cigarette categorized here as “light” (“Lt”) according to the criterion  $6 \leq \text{“tar”} < 15$  mg, as based on FTC tar yield (not brand name).

| Cigarette Brand:                                                     | Marlboro  | Kool King | Marlboro  | Parliament |           |          | Benson & Hedges 100 Camel King |           |           |        |
|----------------------------------------------------------------------|-----------|-----------|-----------|------------|-----------|----------|--------------------------------|-----------|-----------|--------|
|                                                                      | King F HP | F SP Mild | King F SP | Kent 100 F | Winston   | 100 F SP | More 120 F                     | F SP “Lt” | F HP “Lt” |        |
|                                                                      | “Lt”      | Men       | “Lt”      | SP         | King F SP | “Lt”     | SP Men                         | Men       | Wides     | 1R4F   |
| Acetaldehyde                                                         | 5.E-05    | 5.E-05    | 5.E-05    | 6.E-05     | 6.E-05    | 5.E-05   | 6.E-05                         | 6.E-05    | 5.E-05    | 6.E-05 |
| Acrylonitrile                                                        | 2.E-05    | 2.E-05    | 4.E-05    | 4.E-05     | 4.E-05    | 2.E-05   | 3.E-05                         | 2.E-05    | 2.E-05    | 3.E-05 |
| 4-Aminobiphenyl                                                      | 4.E-07    | 4.E-07    | 4.E-07    | 4.E-07     | 4.E-07    | 5.E-07   | 4.E-07                         | 4.E-07    | 4.E-07    | 3.E-07 |
| Arsenic                                                              | 6.E-07    | 4.E-07    | 7.E-07    | 7.E-07     | 1.E-06    | 8.E-07   | 9.E-07                         | 7.E-07    | 6.E-07    | 9.E-07 |
| Benzene                                                              | 9.E-06    | 8.E-06    | 9.E-06    | 9.E-06     | 9.E-06    | 8.E-06   | 1.E-05                         | 1.E-05    | 1.E-05    | 1.E-05 |
| Benzo[a]pyrene                                                       | 3.E-07    | 4.E-07    | 3.E-07    | 4.E-07     | 4.E-07    | 4.E-07   | 5.E-07                         | 4.E-07    | 4.E-07    | 3.E-07 |
| 1,3-Butadiene                                                        | 3.E-05    | 3.E-05    | 3.E-05    | 4.E-05     | 4.E-05    | 5.E-05   | 6.E-05                         | 3.E-05    | 3.E-05    | 4.E-05 |
| Cadmium                                                              | 4.E-06    | 3.E-06    | 4.E-06    | 4.E-06     | 4.E-06    | 2.E-06   | 4.E-06                         | 4.E-06    | 3.E-06    | 4.E-06 |
| Formaldehyde                                                         | 9.E-06    | 1.E-05    | 8.E-06    | 1.E-05     | 2.E-05    | 8.E-06   | 1.E-05                         | 1.E-05    | 1.E-05    | 1.E-05 |
| Lead                                                                 | 9.E-09    | 9.E-09    | 9.E-09    | 1.E-08     | 1.E-08    | 1.E-08   | 1.E-08                         | 1.E-08    | 7.E-09    | 2.E-08 |
| NNK <sup>a</sup> (uses CSF_oral <sup>b</sup> )                       | 3.E-05    | 3.E-05    | 3.E-05    | 4.E-05     | 4.E-05    | 4.E-05   | 3.E-05                         | 3.E-05    | 3.E-05    | 3.E-05 |
| NNN <sup>a</sup>                                                     | 1.E-06    | 9.E-07    | 1.E-06    | 2.E-06     | 2.E-06    | 2.E-06   | 1.E-06                         | 1.E-06    | 1.E-06    | 9.E-07 |
| Quinoline (uses CSF_oral <sup>b</sup> )                              | 9.E-06    | 9.E-06    | 1.E-05    | 2.E-05     | 2.E-05    | 1.E-05   | 2.E-05                         | 1.E-05    | 2.E-05    | 8.E-06 |
| <i>Cancer Risk Sub-Totals</i>                                        |           |           |           |            |           |          |                                |           |           |        |
| Human lung carcinogens <sup>c,d</sup><br>$ILCR_{1}^{sub\Sigma-lung}$ | 4.E-05    | 3.E-05    | 5.E-05    | 6.E-05     | 6.E-05    | 3.E-05   | 5.E-05                         | 4.E-05    | 4.E-05    | 4.E-05 |
| All cancers: $ILCR_{1}^{sub\Sigma}$                                  | 2.E-04    | 2.E-04    | 2.E-04    | 2.E-04     | 2.E-04    | 2.E-04   | 2.E-04                         | 2.E-04    | 2.E-04    | 2.E-04 |

Abbreviations: F = filtered; NF = nonfiltered; HP = hard pack; Men = menthol; SP = soft pack; and “Lt” = “light”.

<sup>a</sup> NNK = 4-(N-nitrosomethylamino)-1-(3-pyridyl)-1-butanone; NNN = N'-nitrososornicotine.

<sup>b</sup> CSF\_oral indicates that the cancer slope factor was determined from an oral exposure study

<sup>c</sup> According to Integrated Risk Information System, U.S. Environmental Protection Agency

<sup>d</sup>  $ILCR_{1}^{sub\Sigma-lung} = \text{sum of } ILCR_1^i \text{ for human lung carcinogens considered here: acrylonitrile, arsenic, cadmium, and formaldehyde.}$

**Table S2.c.** Incremental lifetime cancer risk values ( $ILCR_1^i$ ) based on CSF Set I for 13 carcinogens from ten brands of cigarettes categorized here as “ultralight” (“ULt”) according to the criterion “tar” < 6 mg, as based on FTC tar yields (not brand name).

| Cigarette Brand:                               | Merit King  | True King | Virginia                   | Now King | Virginia                        | Capri 100 F | Carlton 100 | Doral 100 F | Carlton 100 | GPC King F |
|------------------------------------------------|-------------|-----------|----------------------------|----------|---------------------------------|-------------|-------------|-------------|-------------|------------|
|                                                | F SP Ultima | F SP      | Slims 100 F<br>HP Sup-Slim | F SP     | Slims 100 F<br>HP “ULt”<br>Slim | HP “ULt”    | F HP “Lt”   | SP “ULt”    | F SP “Lt”   | SP “ULt”   |
| Acetaldehyde                                   | 2.E-05      | 4.E-05    | 3.E-05                     | 3.E-05   | 4.E-05                          | 3.E-05      | 2.E-05      | 5.E-05      | 2.E-05      | 4.E-05     |
| Acrylonitrile                                  | 1.E-05      | 1.E-05    | 8.E-06                     | 2.E-05   | 3.E-05                          | 2.E-05      | 1.E-05      | 2.E-05      | 8.E-06      | 2.E-05     |
| 4-Aminobiphenyl                                | 2.E-07      | 3.E-07    | 2.E-07                     | 2.E-07   | 3.E-07                          | 2.E-07      | 2.E-07      | 2.E-07      | 2.E-07      | 3.E-07     |
| Arsenic                                        | 1.E-07      | 5.E-07    | 3.E-07                     | 3.E-07   | 7.E-07                          | 6.E-07      | 2.E-07      | 5.E-07      | 1.E-07      | 4.E-07     |
| Benzene                                        | 4.E-06      | 7.E-06    | 3.E-06                     | 5.E-06   | 7.E-06                          | 4.E-06      | 5.E-06      | 1.E-05      | 5.E-06      | 7.E-06     |
| Benzo[a]pyrene                                 | 9.E-08      | 2.E-07    | 2.E-07                     | 1.E-07   | 2.E-07                          | 2.E-07      | 1.E-07      | 2.E-07      | 1.E-07      | 2.E-07     |
| 1,3-Butadiene                                  | 1.E-05      | 2.E-05    | 1.E-05                     | 2.E-05   | 3.E-05                          | 1.E-05      | 2.E-05      | 4.E-05      | 2.E-05      | 3.E-05     |
| Cadmium                                        | 9.E-07      | 2.E-06    | 1.E-06                     | 2.E-06   | 3.E-06                          | 2.E-06      | 1.E-06      | 2.E-06      | 8.E-07      | 2.E-06     |
| Formaldehyde                                   | 2.E-06      | 7.E-06    | 6.E-06                     | 3.E-06   | 5.E-06                          | 7.E-06      | 3.E-06      | 8.E-06      | 3.E-06      | 8.E-06     |
| Lead                                           | 2.E-09      | 6.E-09    | 5.E-09                     | 4.E-09   | 7.E-09                          | 6.E-09      | 3.E-09      | 8.E-09      | 2.E-09      | 5.E-09     |
| NNK <sup>a</sup> (uses CSF_oral <sup>b</sup> ) | 1.E-05      | 2.E-05    | 2.E-05                     | 1.E-05   | 3.E-05                          | 2.E-05      | 1.E-05      | 2.E-05      | 1.E-05      | 2.E-05     |
| NNN <sup>a</sup>                               | 6.E-07      | 1.E-06    | 1.E-06                     | 6.E-07   | 1.E-06                          | 9.E-07      | 6.E-07      | 8.E-07      | 6.E-07      | 8.E-07     |
| Quinoline (uses CSF_oral <sup>b</sup> )        | 4.E-06      | 8.E-06    | 8.E-06                     | 5.E-06   | 9.E-06                          | 1.E-05      | 4.E-06      | 1.E-05      | 4.E-06      | 7.E-06     |
| <i>Cancer Risk Sub-Totals</i>                  |             |           |                            |          |                                 |             |             |             |             |            |
| Human lung carcinogens <sup>c,d</sup>          | 1.E-05      | 2.E-05    | 2.E-05                     | 2.E-05   | 4.E-05                          | 3.E-05      | 1.E-05      | 3.E-05      | 1.E-05      | 3.E-05     |
| $ILCR_1^{sub\Sigma-lung}$                      |             |           |                            |          |                                 |             |             |             |             |            |
| All cancers: $ILCR_1^{sub\Sigma}$              | 7.E-05      | 1.E-04    | 9.E-05                     | 9.E-05   | 2.E-04                          | 1.E-04      | 8.E-05      | 2.E-04      | 7.E-05      | 1.E-04     |

Abbreviations: F = filtered; NF = nonfiltered; HP, hard pack; Men = menthol; SP = soft pack; “Lt” = “light”; and “ULt” = “ultralight”.

<sup>a</sup> NNK = 4-(N'-nitrosomethylamino)-1-(3-pyridyl)-1-butanone; NNN = N'-nitrososnicotine.

<sup>b</sup> CSF\_oral indicates that the cancer slope factor was determined from an oral exposure study

<sup>c</sup> According to Integrated Risk Information System, U.S. Environmental Protection Agency

<sup>d</sup>  $ILCR_1^{sub\Sigma-lung}$  = sum of  $ILCR_1^i$  for human lung carcinogens considered here: acrylonitrile, arsenic, cadmium, and formaldehyde.

**Table S2.d.** Incremental lifetime cancer risk values ( $ILCR_1^i$ ) based on CSF Set I for 13 carcinogens from eight potentially reduced exposure products (PREPS).

| Cigarette Brand:                               | Advance "Lt" Advance "Lt" |           |         |        |        |         |        |        |
|------------------------------------------------|---------------------------|-----------|---------|--------|--------|---------|--------|--------|
|                                                | Premier                   | XDU 2-104 | XDU 740 | TOB-HT | EHC    | Eclipse | 100's  | Kings  |
| Acetaldehyde                                   | 5.E-07                    | 8.E-07    | 1.E-06  | 2.E-06 | 6.E-06 | 2.E-06  | 8.E-06 | 9.E-06 |
| Acrylonitrile                                  | NA                        | NA        | NA      | 1.E-06 | 8.E-07 | 1.E-06  | 7.E-06 | 8.E-06 |
| 4-Aminobiphenyl                                | NA                        | NA        | NA      | NA     | NA     | 7.E-08  | 2.E-07 | 2.E-07 |
| Arsenic                                        | NA                        | NA        | NA      | NA     | 2.E-08 | NA      | NA     | NA     |
| Benzene                                        | 1.E-07                    | 5.E-07    | 8.E-07  | 7.E-07 | 1.E-07 | 5.E-07  | 2.E-06 | 3.E-06 |
| Benzo[a]pyrene                                 | NA                        | 3.E-09    | 7.E-09  | 1.E-08 | NA     | 1.E-08  | 1.E-07 | 1.E-07 |
| 1,3-Butadiene                                  | NA                        | NA        | NA      | 7.E-07 | 1.E-06 | 9.E-07  | 1.E-05 | 1.E-05 |
| Cadmium                                        | NA                        | NA        | NA      | NA     | 2.E-08 | NA      | 3.E-07 | 4.E-07 |
| Formaldehyde                                   | 2.E-06                    | 1.E-06    | 5.E-07  | 2.E-07 | 8.E-06 | 2.E-07  | 3.E-06 | 3.E-06 |
| Lead                                           | NA                        | NA        | NA      | NA     | NA     | NA      | 3.E-09 | 2.E-09 |
| NNK <sup>a</sup> (uses CSF_oral <sup>b</sup> ) | NA                        | NA        | NA      | 3.E-06 | 3.E-06 | 5.E-06  | 4.E-06 | 4.E-06 |
| NNN <sup>a</sup>                               | NA                        | NA        | NA      | 6.E-08 | 1.E-07 | 1.E-07  | 2.E-07 | 2.E-07 |
| Quinoline (uses CSF_oral <sup>b</sup> )        | NA                        | NA        | NA      | NA     | NA     | 1.E-07  | 2.E-06 | 2.E-06 |
| <i>Cancer Risk Sub-Totals</i>                  |                           |           |         |        |        |         |        |        |
| Human lung carcinogens <sup>c,d</sup>          |                           |           |         |        |        |         |        |        |
| $ILCR_1^{sub\Sigma-lung}$                      | 2.E-06                    | 1.E-06    | 5.E-07  | 1.E-06 | 8.E-06 | 1.E-06  | 1.E-05 | 1.E-05 |
| All cancers: $ILCR_1^{sub\Sigma}$              | 2.E-06                    | 2.E-06    | 3.E-06  | 8.E-06 | 2.E-05 | 1.E-05  | 4.E-05 | 4.E-05 |

Abbreviations: TOB-HT = heated tobacco; EHC = electrically heated cigarette; Lt = "light"; and NA = not available.

<sup>a</sup> NNK = 4-(N'-nitrosomethylamino)-1-(3-pyridyl)-1-butanone; NNN = N'-nitrososornicotine.

<sup>b</sup> CSF\_oral indicates that the cancer slope factor was determined from an oral exposure study

<sup>c</sup> According to Integrated Risk Information System, U.S. Environmental Protection Agency

<sup>d</sup>  $ILCR_1^{sub\Sigma-lung}$  = sum of  $ILCR_1^i$  for human lung carcinogens considered here: acrylonitrile, arsenic, cadmium, and formaldehyde.
